# Supplementary material for: Cucurbitacin B Alters the Expression of Tumor-Related Genes by Epigenetic Modifications in NSCLC and Inhibits NNK-Induced Lung Tumorigenesis
Source: Oxford University Press journal article supplement (doi:10.1158/1940-6207.capr-14-0286), 2015-03-27
Supplement: 19406207capr140286-sup-137158_2_supp_2879956_nkqdz4.doc [file 19406207capr140286-sup-137158_2_supp_2879956_nkqdz4.doc]

Supplementary Table S1. The isolation and the spectral data of CuB

| **Isolation of CuB** |
| --- |
| Air dried fruits of *L. graveolense* Roxb. (6 Kg) were pulverized and extracted with ethanol (20 L) in a cold percolator for 24 hours. Ethanolic extract (230 g) was triturated with n-hexane and chloroform (each 3 × 2 L), and the organic layers were evaporated *in vacuo* to give hexane (80 g) and chloroform (85 g) fractions, respectively. The chloroform soluble fraction (85 g) was chromatographed over silica gel (60-120 mesh). The column was eluted with hexane with increasing amount of ethyl acetate to yield fractions F1-F10. Fractions F4 and F5 were rechromatographed on a silica gel column using a hexane: ethyl acetate (3:1 to 0:1) to give sub-fractions (A1 to A6). On the basis of TLC profile, sub fraction A4-A6 were mixed and subjected to column chromatography over silica gel (230-400 mesh), eluted with CHCl3:MeOH (98:2) mixture afforded CuB (2 g, 0.86% of extract). The spectral data of isolated CuB is given below: |
| **Spectral Data of CuB** |
| 1H NMR (300 MHz, CDCl3)  ppm 0.93 ( 3H, brs, H-18), 1.03 (3H, s, H-19), 1.20 (1H, m, H-1b), 1.25 (3H, s, H-21), 1.30 (3H, brs., H-28), 1.33 (3H, brs., H-29), 1.40 (3H, s, H-30), 1.40 (1H, s, H-15b), 1.52 (6H, s, H-26, H-27), 1.83 (1 H, dd, *J* = 12.4, 9.25 Hz, H-15a), 1.92 (1H, brs., H-8), 1.97 (3H, s, CH3, acetate), 2.13 (1H, brs., H-7b), 2.25 (1H, ddd, *J* = 12.6, 6.3, 2.4 Hz, H-1a), 2.34 (1H, d, *J* = 7.5 Hz, H-7a), 2.48 (1H, d, *J* = 6.8 Hz, H-17), 2.62 (1H, d, *J* = 14.5 Hz, H-12b), 2.73 (1H, d, *J* = 12.6 Hz, H-10), 3.21 (1H, d, *J* = 14.5 Hz, H-12a), 4.26 (1H, s, H-2), 4.29 - 4.43 (1H, m, H-16), 5.75 (1H, brs., H-6), 6.47 (1H, d, *J* = 15.6 Hz, H-24), 7.02 (1H, d, *J* = 15.6 Hz, H-23); 13C NMR (CDCl3)  ppm 18.8 (C-30, CH3­), 19.9 (C-19, CH3), 20.0 (C-18, CH3), 21.3 (32, AcMe), 21.9 (C-29, CH3), 23.9 (C-7, CH2), 24.0 (C-21, CH3), 26.2 (C-26, CH3), 26.3 (C-27, CH3), 29.4 (C-28, CH3), 33.7 (C-10, CH), 36.0 (C-1, CH2), 42.4 (C-8, CH), 45.3 (C-15, CH2), 48.1 (C-14, C), 48.4 (C-9, C), 48.6 (C-12, CH2), 50.3 (C-13, C), 50.6 (C-4, C), 58.1 (C-17, CH), 71.1 (C-2, CH), 71.6 (C-16, CH), 78.4 (C-25, C), 79.4 (C-20, C), 120.4 (C-23, CH), 120.5 (C-6, CH), 140.4 (C-5, C), 151.7 (C-24, CH), 170.2 (31 Ac), 202.6 (C-22, C, CO), 212.4 (C-11, C,CO), 213.1 (C-3, C); Positive ion ESIMS molecular ion cluster peaks at 579.3 [M+Na]+. |

Supplementary Table S2. List of Primers used for qRT-PCR analysis

| **Human gene** | **Primer Sequence** | **Annealing Temperature (TA) (°C)** |
| --- | --- | --- |
| ***p16* RT-F**  ***p16* RT-R** | 5’-CCCAACGCACCGAATAGTTA-3’  5’-ACCAGCGTGTCCAGGAAG-3’ | 55 |
| ***p21* RT-F**  ***p21* RT-R** | 5'-CCTCCCCCTTGTCCTTTC-3'  5'-GTGGGACAGGCACCTCAG-3' | 58 |
| ***DNMT1* RT-F**  ***DNMT1* RT-R** | 5’-TACCTGGACGACCCTGACCTC-3’  5’-CGTTGGCATCAAAGATGGACA-3’ | 57 |
| ***DNMT3a* RT-F**  ***DNMT3a* RT-R** | 5’-ATTGATGAGCGCACAAGAGAGAGC-3’  5’-GGGTGTTCCAGGGTAACATTGAG-3’ | 57 |
| ***DNMT3b* RT-F**  ***DNMT3b* RT-R** | 5’- GGCAAGTTCTCCGAGGTCTCTG-3’  5’-TGGTACATGGCTTTTCGATAGGA-3’ | 57 |
| ***hTERT* RT-F**  ***hTERT RT-R*** | 5’-AGGGGCAAGTCCTACGTCCAGT-3’  5’-CACCAACAAGAAATCATCCACC-3’ | 52 |
| ***c-MYC* RT-F**  ***c-MYC* RT-R** | 5’-GGACGACGAGACCTTCATCAA-3’  5’-CCAGCTTCTCTGAGACGAGCTT-3’ | 55 |
| ***K-RAS* RT-F**  ***K-RAS* RT-R** | 5’-GACGGCCGAAGCTTGCTGAAAATGACTGAATATAAACTTC-3’  5’-CAGGATCCTCATTACATAATTACACACTTTG-3’ | 55 |
| ***GAPDH* RT-F**  ***GAPDH* RT-R** | 5’-GAAGGTCGGAGTCAACGGATTT-3’  5'-ATGGGTGGAATCATATTGGAAC-3’ | 57 |
| **Mouse gene** | **Primer Sequence** | **(TA) (°C)** |
| ***p16* RT-F**  ***p16* RT-R** | 5’-GCTCTGGCTTTCGTGAACAT-3’  5’-TCGAATCTGCACCGTAGTTG-3’ | 58 |
| ***p21* RT-F**  ***p21* RT-R** | 5’-CGGTGTCAGAGTCTAGGGGA-3’  5’-AGAGACAACGGCACACTTTG-3’ | 58 |
| ***Tert* RT-F**  ***Tert* RT-R** | 5’-GGCCAAGTCCACAAGTCCT-3’  5’-ACTGCAGAGCAGGGTGGATA-3’ | 58 |
| ***Gapdh* RT-F**  ***Gapdh* RT-R** | 5’-AGCAATGCCTCCTGCACCACCAAC-3’  5’-CCGGAGGGGCCATCCACAGTCT-3’ | 58 |

Supplementary Table S3. List of Primers used in ChIP- and MSP-analyses

| **Genes** | **Primer Sequence used for ChIP-assay** | **Annealing Temperature (TA) (°C)** |
| --- | --- | --- |
| ***p16* ChIP-1F**  ***p16* ChIP-1R** | 5'-AGTTTCGCTCTTGTCTCCCAG-3'  5'-CATGGCGAAACCCTGTCTCTA-3' | 62(2), 60(3),  58(4), 52(12) |
| ***p16* ChIP-2F**  ***p16* ChIP-2R** | 5'-GATTATAGACGTGAGCCACCGC-3'  5'-AGGCAGGAGAATCGCTTGAAC-3' | 58.3 |
| ***p16* ChIP-3F**  ***p16* ChIP-3R** | 5'-CCCTTCCCCCCTTATAATTACG-3'  5'-GGACGGACTCCATTCTCAAAG-3' | 62(2), 60(3),  58(4), 52(24) |
| ***p16* ChIP-4F**  ***p16* ChIP-4R** | 5'-AGACAGCCGTTTTACACGCAG-3'  5'-CACCGAGAAATCGAAATCACC-3' | 62(2), 60(3),  58(4), 52(21) |
| ***p16* ChIP-5F**  ***p16* ChIP-5R** | 5'-TAGGAAGGTTGTATCGCGGAGG-3'  5'-CAAGGAAGGAGGACTGGGCTC-3' | 62 |
| ***p21* ChIP-1F**  ***p21* ChIP-1R** | 5’-GCCTGTTTTCAGGTGAGGAA-3’  5’-AGTTTGCAACCATGCACTTG-3’ | 60.5 |
| ***p21* ChIP-2F**  ***p21* ChIP-2R** | 5’-AGGGCAGAAGTCCTCCCTTA-3’  5’-TCTAAGCCCCACTGCTGTCT-3’ | 61.8 |
| ***hTERT* ChIP-1F**  ***hTERT* ChIP-1R** | 5'-CCGGACCTGGAGGCAGCC-3'  5'-CCCCAGCGGAGAGAGGTC-3' | 60 |
| ***hTERT* ChIP-2F**  ***hTERT* ChIP-2R** | 5'-ACCTCTCTCCGCTGGGGC-3'  5'-CGTCTGTGCCCGCGAATC-3' | 60 |
| ***hTERT* ChIP-3F**  ***hTERT* ChIP-3R** | 5'-GGACCGCGCTTCCCACGT-3'  5'-AGGAAGGGGAGGGGCTGG-3' | 60 |
| ***hTERT* ChIP-4F**  ***hTERT* ChIP-4R** | 5'-AGCCCCTCCCCTTCCTTTCC-3'  5'-AGCGCACGGCTCGGCAGC-3' | 60 |
| ***hTERT* ChIP-5F**  ***hTERT* ChIP-5R** | 5'-AGCCGTGCGCTCCCTGCT-3'  5'-GCACGCACACCAGGCACT-3' | 60 |
| **Genes** | **Primer Sequence used in MSP-analysis** | **Annealing Temperature (TA) (°C)** |
| ***hTERT* unmet-1F**  ***hTERT* unmet-1R** | 5'-GGGAGGTATTTTGGGAGGTTTTGT-3'  5'-CAAACTCCAAACACCACAAATACCA-3' | 58 |
| ***hTERT* met-1F**  ***hTERT* met-1R** | 5'-GAGGTATTTCGGGAGGTTTCGC-3'  5'-ACTCCGAACACCACGAATACCG-3' | 58 |
| ***p21* unmet-F**  ***p21* unmet-R** | 5’-TTGGGTGTGGATTTGTTGAGG-3’  5’-CAACTCTAAACCACCAACCCA-3’ | 53 |
| ***p21* met-F**  ***p21* met-R** | 5’-TTGGGCGCGGATTCGTCG-3’  5’-CTCTAAACCGCCGACCCGA-3’ | 55 |

Supplementary Table S4. Histopathological grading of CuB-treated NNK-induced lung tumorigenesis in A/J mice

| **Histopathological Parameter** | **Vehicle** | **NNK** | **NNK+ 0.1 mg/Kg b.w CuB** | **NNK+ 0.2 mg/Kg b.w. CuB** |
| --- | --- | --- | --- | --- |
| Alveolar Epithelial Hyperplasia | 0 | 3 | 2 | 0 |
| Bronchial Epithelial Hyperplasia | 0 | 4 | 2 | 1 |
| Micro adenoma Formation | 0 | 4 | 3 | 1 |
| Vascular changes (Congestion and hemorrhage) | 1 | 1 | 0 | 0 |
| Vascular Proliferation (Angiogenesis) | 0 | 2 | 1 | 1 |

**0=Absent; 1=Mild; 2=Moderate; 3=Severe; 4=Extensive**
